# Supplementary material for: An Epigenome-Wide Association Study of DNA Methylation and Proliferative Retinopathy over 28 Years in Type 1 Diabetes
Source: PubMed Central journal article supplement — Ophthalmol Sci. 2024 Feb 28;4(4):100497. doi: 10.1016/j.xops.2024.100497 (PMC11004204; doi:10.1016/j.xops.2024.100497), 2024-02-28
Supplement: mmc1.pdf [file mmc1.pdf]

A.

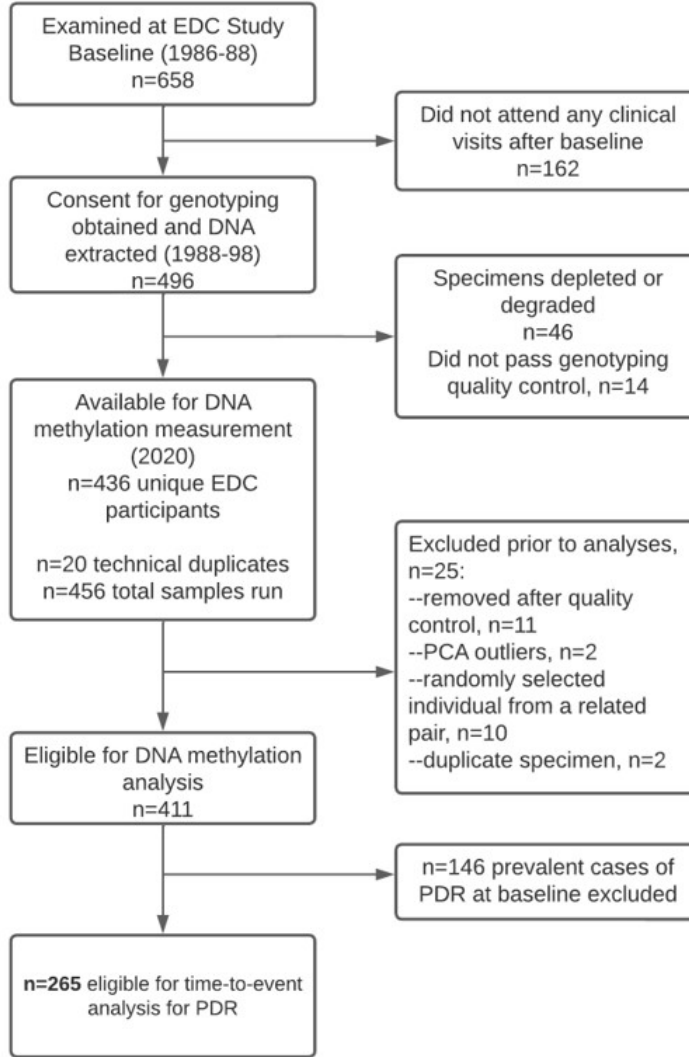

B.

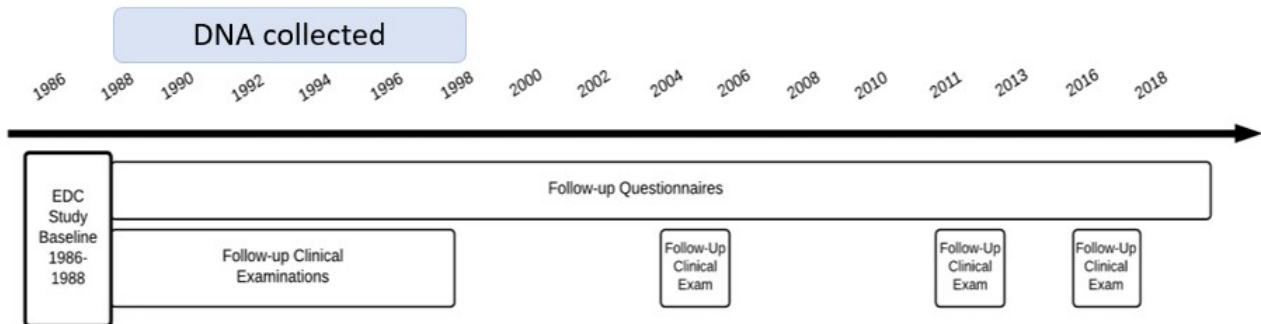

**Figure S1.** Flowchart and timeline for the EDC DNA methylation sub-study. Panel A – flowchart summarizing the determination of the analytic sample for DNA methylation and time to proliferative diabetic retinopathy (PDR) in the EDC type 1 diabetes cohort. Panel B – study timeline. “Baseline” is the participant-specific time point at which the DNA specimen was collected between 1988-1998.
