# Supplementary material for: An Epigenome-Wide Association Study of DNA Methylation and Proliferative Retinopathy over 28 Years in Type 1 Diabetes
Source: PubMed Central journal article supplement — Ophthalmol Sci. 2024 Feb 28;4(4):100497. doi: 10.1016/j.xops.2024.100497 (PMC11004204; doi:10.1016/j.xops.2024.100497), 2024-02-28
Supplement: mmc2.pdf [file mmc2.pdf]

**Table S3.** Cross-sectional minimally adjusted associations between cg27512687 and traditional clinical risk factors

|            | HbA1c                           | HDLc                              | Non-HDLc                          | ln(Trigs)                       | SBP                              | DBP                                | HTN                             | Pulse Rate                                             | BMI                             | ln(AER)                                               | eGFR                                                   |
|------------|---------------------------------|-----------------------------------|-----------------------------------|---------------------------------|----------------------------------|------------------------------------|---------------------------------|--------------------------------------------------------|---------------------------------|-------------------------------------------------------|--------------------------------------------------------|
| cg27512687 | -0.0005<br>(0.0004),<br>p=0.180 | -0.000002<br>(0.0001),<br>p=0.972 | -0.00002<br>(0.00002),<br>p=0.186 | -0.0010<br>(0.0012),<br>p=0.411 | -0.4061<br>(0.00005),<br>p=0.407 | -0.000004<br>(0.00007),<br>p=0.948 | -0.0040<br>(0.0024),<br>p=0.010 | <b>-0.0001</b><br><b>(0.00006)</b> ,<br><b>p=0.050</b> | -0.0001<br>(0.0002),<br>p=0.795 | <b>-0.0008</b><br><b>(0.0004)</b> ,<br><b>p=0.042</b> | <b>0.00005</b><br><b>(0.00003)</b> ,<br><b>p=0.064</b> |

Values are regression coefficient (standard error), p-value. Models are adjusted for diabetes duration, sex, pack years of smoking, and estimated cell type composition. Variables with p-values <0.10 (indicated with bold font) were included in multivariable model fitting.
