# Supplementary material for: An Epigenome-Wide Association Study of DNA Methylation and Proliferative Retinopathy over 28 Years in Type 1 Diabetes
Source: PubMed Central journal article supplement — Ophthalmol Sci. 2024 Feb 28;4(4):100497. doi: 10.1016/j.xops.2024.100497 (PMC11004204; doi:10.1016/j.xops.2024.100497), 2024-02-28
Supplement: mmc3.pdf [file mmc3.pdf]

**Table S4.** Associations between cg27512687 methylation and 28-Year longitudinal clinical risk factors

|                    | <b>β per 5% cg27512687 methylation (standard error)</b> | <b>p-value*</b> |
|--------------------|---------------------------------------------------------|-----------------|
| HbA1c              | -0.45 (0.34)                                            | 0.183           |
| HDLc               | 2.14 (3.33)                                             | 0.521           |
| Non-HDLc           | -10.49 (9.20)                                           | 0.255           |
| ln(Triglycerides)  | -0.24 (0.13)                                            | 0.066           |
| <b>Systolic BP</b> | <b>-6.97 (3.30)</b>                                     | <b>0.035</b>    |
| Diastolic BP       | -1.66 (2.07)                                            | 0.423           |
| <b>Pulse rate</b>  | <b>-4.81 (2.05)</b>                                     | <b>0.019</b>    |
| BMI                | 0.27 (1.02)                                             | 0.790           |
| <b>ln(AER)</b>     | <b>-1.50 (0.47)</b>                                     | <b>0.002</b>    |
| <b>eGFR</b>        | <b>13.63 (4.96)</b>                                     | <b>0.006</b>    |

Bold text indicates  $p < 0.05$

\*adjusted for type 1 diabetes duration, sex, pack years of smoking, and cell type composition
