# Supplementary material for: An Epigenome-Wide Association Study of DNA Methylation and Proliferative Retinopathy over 28 Years in Type 1 Diabetes
Source: PubMed Central journal article supplement — Ophthalmol Sci. 2024 Feb 28;4(4):100497. doi: 10.1016/j.xops.2024.100497 (PMC11004204; doi:10.1016/j.xops.2024.100497), 2024-02-28
Supplement: mmc4.pdf [file mmc4.pdf]

**Table S5.** Methylation quantitative trait loci (meQTLs) for cg27512687 in the EDC cohort

| CHR | Hg38 Position | BETA      | SE        | P        | Whole Blood eQTL (GTEx) |
|-----|---------------|-----------|-----------|----------|-------------------------|
| 20  | 16427627      | -0.008759 | 0.001426  | 1.95E-09 | Yes                     |
| 20  | 16479946      | -0.01229  | 0.001927  | 5.01E-10 | Yes                     |
| 20  | 16480971      | -0.01229  | 0.001927  | 5.01E-10 | Yes                     |
| 20  | 16484370      | -0.01011  | 0.001686  | 4.44E-09 | Yes                     |
| 20  | 16484602      | -0.01011  | 0.001686  | 4.44E-09 | Yes                     |
| 20  | 16485563      | -0.01038  | 0.001693  | 2.09E-09 | Yes                     |
| 20  | 16486951      | -0.01038  | 0.001693  | 2.09E-09 | Yes                     |
| 20  | 16487568      | -0.01251  | 0.001941  | 3.34E-10 | Yes                     |
| 20  | 16487652      | -0.01038  | 0.001693  | 2.09E-09 | Yes                     |
| 20  | 16489925      | -0.01028  | 0.001684  | 2.44E-09 | Yes                     |
| 20  | 16527435      | -0.006616 | 0.0009936 | 9.12E-11 | Yes                     |
| 20  | 16530620      | -0.0123   | 0.00139   | 2.81E-17 | Yes                     |
| 20  | 16532685      | -0.0133   | 0.001839  | 2.40E-12 | No                      |
| 20  | 16538593      | -0.01217  | 0.001181  | 3.08E-22 | Yes                     |
| 20  | 16550445      | -0.01217  | 0.001181  | 3.08E-22 | Yes                     |
| 20  | 16551785      | -0.01371  | 0.001358  | 1.68E-21 | Yes                     |
| 20  | 16554303      | -0.005104 | 0.0008761 | 1.17E-08 | Yes                     |
| 20  | 16554911      | -0.005104 | 0.0008761 | 1.17E-08 | Yes                     |
| 20  | 16555510      | -0.01199  | 0.001088  | 7.10E-25 | No                      |
| 20  | 16557998      | -0.006027 | 0.00095   | 6.05E-10 | Yes                     |
| 20  | 16558819      | -0.006027 | 0.00095   | 6.05E-10 | Yes                     |
| 20  | 16559390      | -0.006027 | 0.00095   | 6.05E-10 | Yes                     |
| 20  | 16560569      | -0.01199  | 0.001088  | 7.10E-25 | Yes                     |
| 20  | 16561784      | -0.01153  | 0.001058  | 2.07E-24 | Yes                     |
| 20  | 16564714      | 0.006359  | 0.0009058 | 9.54E-12 | Yes                     |
| 20  | 16564723      | -0.01222  | 0.001031  | 5.31E-28 | Yes                     |
| 20  | 16565489      | -0.0123   | 0.001031  | 2.80E-28 | Yes                     |
| 20  | 16565690      | -0.0123   | 0.001031  | 2.80E-28 | Yes                     |
| 20  | 16565753      | -0.0123   | 0.001031  | 2.80E-28 | Yes                     |
| 20  | 16567884      | -0.0123   | 0.001031  | 2.80E-28 | Yes                     |
| 20  | 16569421      | -0.01233  | 0.001031  | 2.09E-28 | Yes                     |
| 20  | 16569970      | -0.00902  | 0.0009751 | 1.35E-18 | No                      |
| 20  | 16571536      | -0.01249  | 0.001025  | 2.97E-29 | No                      |
| 20  | 16571690      | -0.01249  | 0.001025  | 2.97E-29 | Yes                     |
| 20  | 16572319      | -0.01249  | 0.001025  | 2.97E-29 | Yes                     |
| 20  | 16572462      | 0.006281  | 0.0009067 | 1.71E-11 | No                      |
| 20  | 16574387      | 0.006281  | 0.0009067 | 1.71E-11 | Yes                     |
| 20  | 16574975      | -0.01249  | 0.001025  | 2.97E-29 | Yes                     |
| 20  | 16577615      | -0.01249  | 0.001025  | 2.97E-29 | Yes                     |
| 20  | 16578145      | -0.01249  | 0.001025  | 2.97E-29 | Yes                     |
| 20  | 16578761      | -0.01249  | 0.001025  | 2.97E-29 | Yes                     |
| 20  | 16578863      | -0.01246  | 0.001027  | 4.28E-29 | Yes                     |
| 20  | 16579015      | -0.01246  | 0.001027  | 4.28E-29 | Yes                     |
| 20  | 16579685      | -0.01242  | 0.00103   | 8.57E-29 | Yes                     |
| 20  | 16580558      | -0.01229  | 0.001034  | 4.19E-28 | Yes                     |
| 20  | 16580715      | -0.01229  | 0.001034  | 4.19E-28 | Yes                     |
| 20  | 16581264      | -0.01229  | 0.001034  | 4.19E-28 | Yes                     |
| 20  | 16581362      | -0.01229  | 0.001034  | 4.19E-28 | Yes                     |
| 20  | 16581463      | -0.01229  | 0.001034  | 4.19E-28 | Yes                     |
| 20  | 16581651      | -0.01229  | 0.001034  | 4.19E-28 | Yes                     |
| 20  | 16581815      | -0.01229  | 0.001034  | 4.19E-28 | Yes                     |
| 20  | 16582030      | -0.006763 | 0.000901  | 3.96E-13 | No                      |
| 20  | 16582522      | -0.01222  | 0.001034  | 7.26E-28 | Yes                     |
| 20  | 16583455      | -0.01233  | 0.00103   | 1.88E-28 | No                      |
| 20  | 16584380      | -0.01229  | 0.001034  | 4.19E-28 | Yes                     |
| 20  | 16585447      | 0.005843  | 0.0009065 | 3.31E-10 | Yes                     |
| 20  | 16586557      | 0.005843  | 0.0009065 | 3.31E-10 | Yes                     |
| 20  | 16587417      | 0.005843  | 0.0009065 | 3.31E-10 | Yes                     |
| 20  | 16589520      | 0.005886  | 0.0008999 | 1.88E-10 | Yes                     |
| 20  | 16589528      | 0.005904  | 0.0009027 | 1.88E-10 | Yes                     |
| 20  | 16589833      | 0.005904  | 0.0009027 | 1.88E-10 | Yes                     |

|    |          |           |           |          |     |
|----|----------|-----------|-----------|----------|-----|
| 20 | 16589954 | 0.005904  | 0.0009027 | 1.88E-10 | Yes |
| 20 | 16590289 | 0.005904  | 0.0009027 | 1.88E-10 | Yes |
| 20 | 16590544 | 0.005904  | 0.0009027 | 1.88E-10 | Yes |
| 20 | 16590821 | 0.005886  | 0.0008999 | 1.88E-10 | Yes |
| 20 | 16607442 | -0.01228  | 0.001246  | 1.21E-20 | Yes |
| 20 | 16615968 | -0.01172  | 0.001042  | 1.10E-25 | Yes |
| 20 | 16620566 | 0.005543  | 0.000894  | 1.40E-09 | Yes |
| 20 | 16621904 | -0.008956 | 0.001224  | 1.39E-12 | Yes |
| 20 | 16622004 | -0.005437 | 0.0008964 | 3.06E-09 | Yes |
| 20 | 16622152 | -0.005437 | 0.0008964 | 3.06E-09 | Yes |
| 20 | 16622646 | -0.009497 | 0.001054  | 8.40E-18 | Yes |
| 20 | 16622774 | -0.005217 | 0.0009027 | 1.51E-08 | Yes |
| 20 | 16622951 | -0.005721 | 0.0009297 | 1.84E-09 | Yes |
| 20 | 16623945 | -0.005257 | 0.0009256 | 2.59E-08 | Yes |
| 20 | 16624059 | -0.008405 | 0.001204  | 1.24E-11 | Yes |
| 20 | 16624209 | -0.005257 | 0.0009256 | 2.59E-08 | Yes |
| 20 | 16624614 | -0.005257 | 0.0009256 | 2.59E-08 | No  |
| 20 | 16624615 | -0.006945 | 0.001136  | 2.32E-09 | No  |
| 20 | 16625293 | -0.005257 | 0.0009256 | 2.59E-08 | Yes |
| 20 | 16625446 | -0.007576 | 0.001213  | 1.08E-09 | No  |
| 20 | 16626409 | -0.006855 | 0.001137  | 3.73E-09 | Yes |
| 20 | 16627103 | -0.005166 | 0.0009226 | 4.00E-08 | Yes |
| 20 | 16627325 | -0.008405 | 0.001204  | 1.24E-11 | Yes |
| 20 | 16627673 | -0.005166 | 0.0009226 | 4.00E-08 | No  |
| 20 | 16629962 | -0.007462 | 0.001212  | 1.82E-09 | Yes |
| 20 | 16632463 | -0.007639 | 0.001221  | 1.01E-09 | Yes |
| 20 | 16633012 | -0.007828 | 0.001232  | 5.66E-10 | Yes |
| 20 | 16633266 | -0.007828 | 0.001232  | 5.66E-10 | Yes |
| 20 | 16634246 | -0.007958 | 0.001231  | 2.96E-10 | Yes |
| 20 | 16634406 | -0.009921 | 0.001632  | 2.82E-09 | Yes |
| 20 | 16635691 | -0.007916 | 0.001235  | 4.04E-10 | Yes |
| 20 | 16637138 | -0.007428 | 0.00122   | 2.70E-09 | No  |
| 20 | 16642448 | -0.007167 | 0.00121   | 6.82E-09 | Yes |
| 20 | 16642681 | -0.007167 | 0.00121   | 6.82E-09 | Yes |
| 20 | 16642813 | -0.007167 | 0.00121   | 6.82E-09 | Yes |
| 20 | 16643009 | -0.007167 | 0.00121   | 6.82E-09 | Yes |
| 20 | 16643738 | -0.00712  | 0.001208  | 8.08E-09 | Yes |
| 20 | 16643888 | -0.007167 | 0.00121   | 6.82E-09 | Yes |
| 20 | 16643925 | -0.007289 | 0.001213  | 4.15E-09 | Yes |
| 20 | 16644851 | -0.007167 | 0.00121   | 6.82E-09 | Yes |
| 20 | 16644955 | -0.007167 | 0.00121   | 6.82E-09 | No  |
| 20 | 16644965 | -0.007167 | 0.00121   | 6.82E-09 | No  |
| 20 | 16647053 | -0.00693  | 0.001207  | 1.87E-08 | No  |
| 20 | 16647524 | -0.007167 | 0.00121   | 6.82E-09 | Yes |
| 20 | 16649684 | -0.007167 | 0.00121   | 6.82E-09 | Yes |
| 20 | 16651848 | -0.007167 | 0.00121   | 6.82E-09 | Yes |
| 20 | 16652493 | -0.008011 | 0.001261  | 5.76E-10 | Yes |
| 20 | 16658211 | -0.007167 | 0.00121   | 6.82E-09 | Yes |
| 20 | 16662776 | -0.009401 | 0.00163   | 1.61E-08 | Yes |
| 20 | 16663206 | -0.006667 | 0.00118   | 3.06E-08 | No  |
| 20 | 16672055 | -0.006177 | 0.0009938 | 1.28E-09 | Yes |
| 20 | 16672137 | -0.006177 | 0.0009938 | 1.28E-09 | No  |
