# Supplementary material for: An Epigenome-Wide Association Study of DNA Methylation and Proliferative Retinopathy over 28 Years in Type 1 Diabetes
Source: PubMed Central journal article supplement — Ophthalmol Sci. 2024 Feb 28;4(4):100497. doi: 10.1016/j.xops.2024.100497 (PMC11004204; doi:10.1016/j.xops.2024.100497), 2024-02-28
Supplement: mmc5.pdf [file mmc5.pdf]

**Table S7.** Significantly enriched Reactome pathways identified in functional interaction network analysis of loci with PDR-associated CpGs (FDR<0.05) or differentially methylated regions (Šidák value<0.05)

| Network Module | Top-level Pathway            | Sub-pathway                          | Sub-sub-pathway                                                           | p-value | FDR   | Node(s)        |
|----------------|------------------------------|--------------------------------------|---------------------------------------------------------------------------|---------|-------|----------------|
| 1              | Vesicle-mediated transport   | Membrane Trafficking                 | RAB GEFs exchange GTP for GDP on RABs                                     | 0.012   | 0.013 | <i>RIN2</i>    |
| 1              | Transport of small molecules | SLC-mediated transmembrane transport | Transport of bile salts and organic acids, metal ions and amine compounds | 0.004   | 0.007 | <i>SLC44A4</i> |
| 1              | Metabolism                   | Metabolism of Lipids                 | Glycerophospholipid biosynthesis                                          | 0.007   | 0.007 | <i>SLC44A4</i> |
| 2              | Metabolism                   | Metabolism of Carbohydrates          | Blood group systems biosynthesis                                          | 0.001   | 0.002 | <i>FUT4</i>    |
| 4              | Signal Transduction          | MTOR signalling                      | n/a                                                                       | 0.007   | 0.009 | <i>FKBP1A</i>  |
| 4              | Signal Transduction          | Signaling by TGFB family members     | Signaling by TGF-beta Receptor Complex                                    | 0.015   | 0.015 | <i>FKBP1A</i>  |
